# Supplementary material for: Cancer incidence and mortality projections in the UK until 2035
Source: PubMed Central journal article supplement (PMC5117795; doi:10.1038/bjc.2016.304), 2016-10-11

Observed and projected incidence age standardised rates (ASRs) per 100,000 15-90+ year olds, for each cancer site by age group and sex

Prostate\*

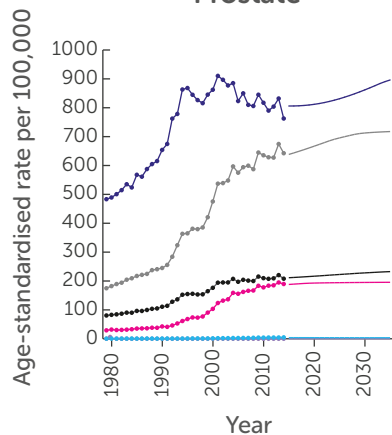

Lung

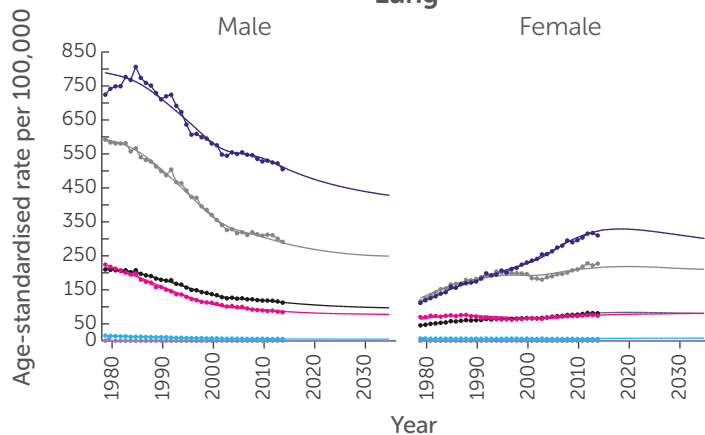

Breast\*

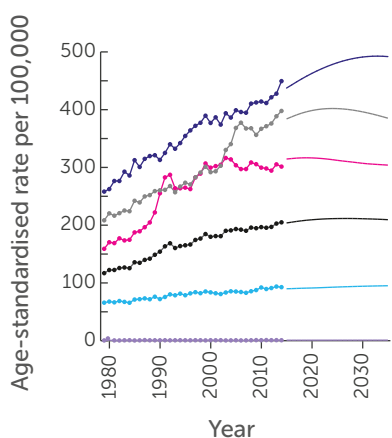

Bowel

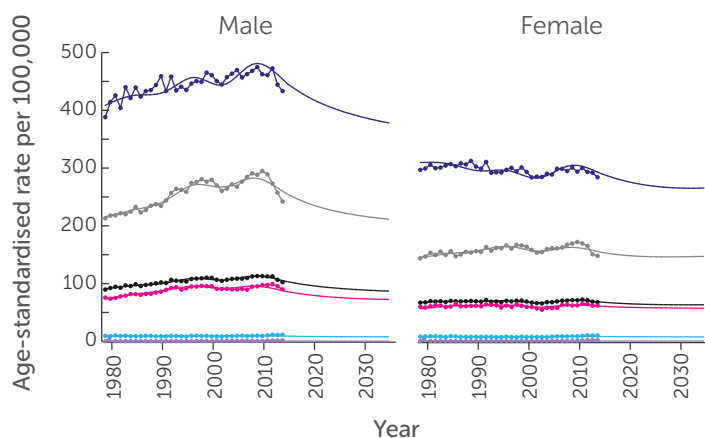

Other

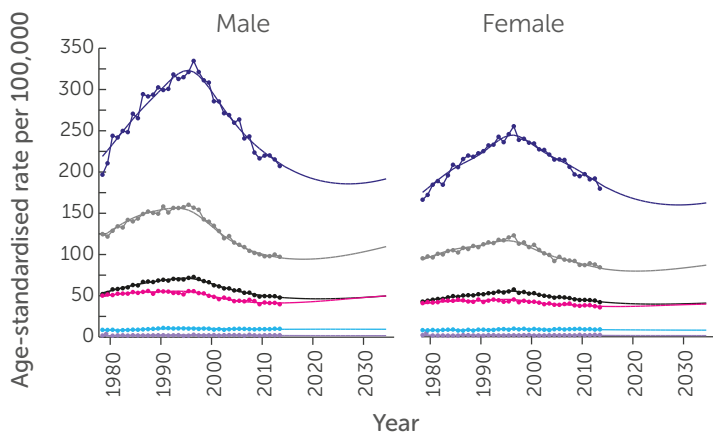

Bladder

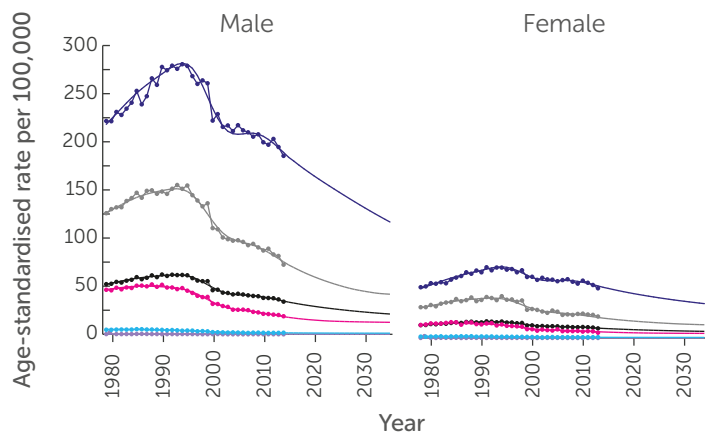

Stomach

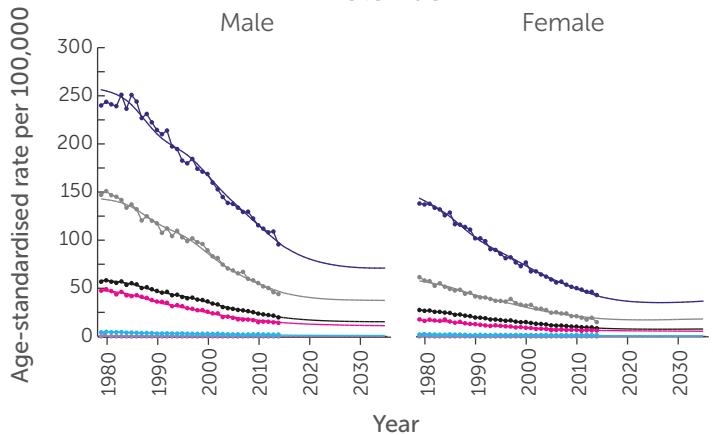

Age group:

- 75+
- 65-74
- 50-64
- 25-49
- 15-24
- All ages (15-90+)

\*Please note that projections for 1979-2014 are not shown due to a modified dataset being used to calculate projections for this cancer site. For more details, please see Materials and Methods.

Observed and projected incidence age standardised rates (ASRs) per 100,000 15-90+ year olds, for each cancer site by age group and sex

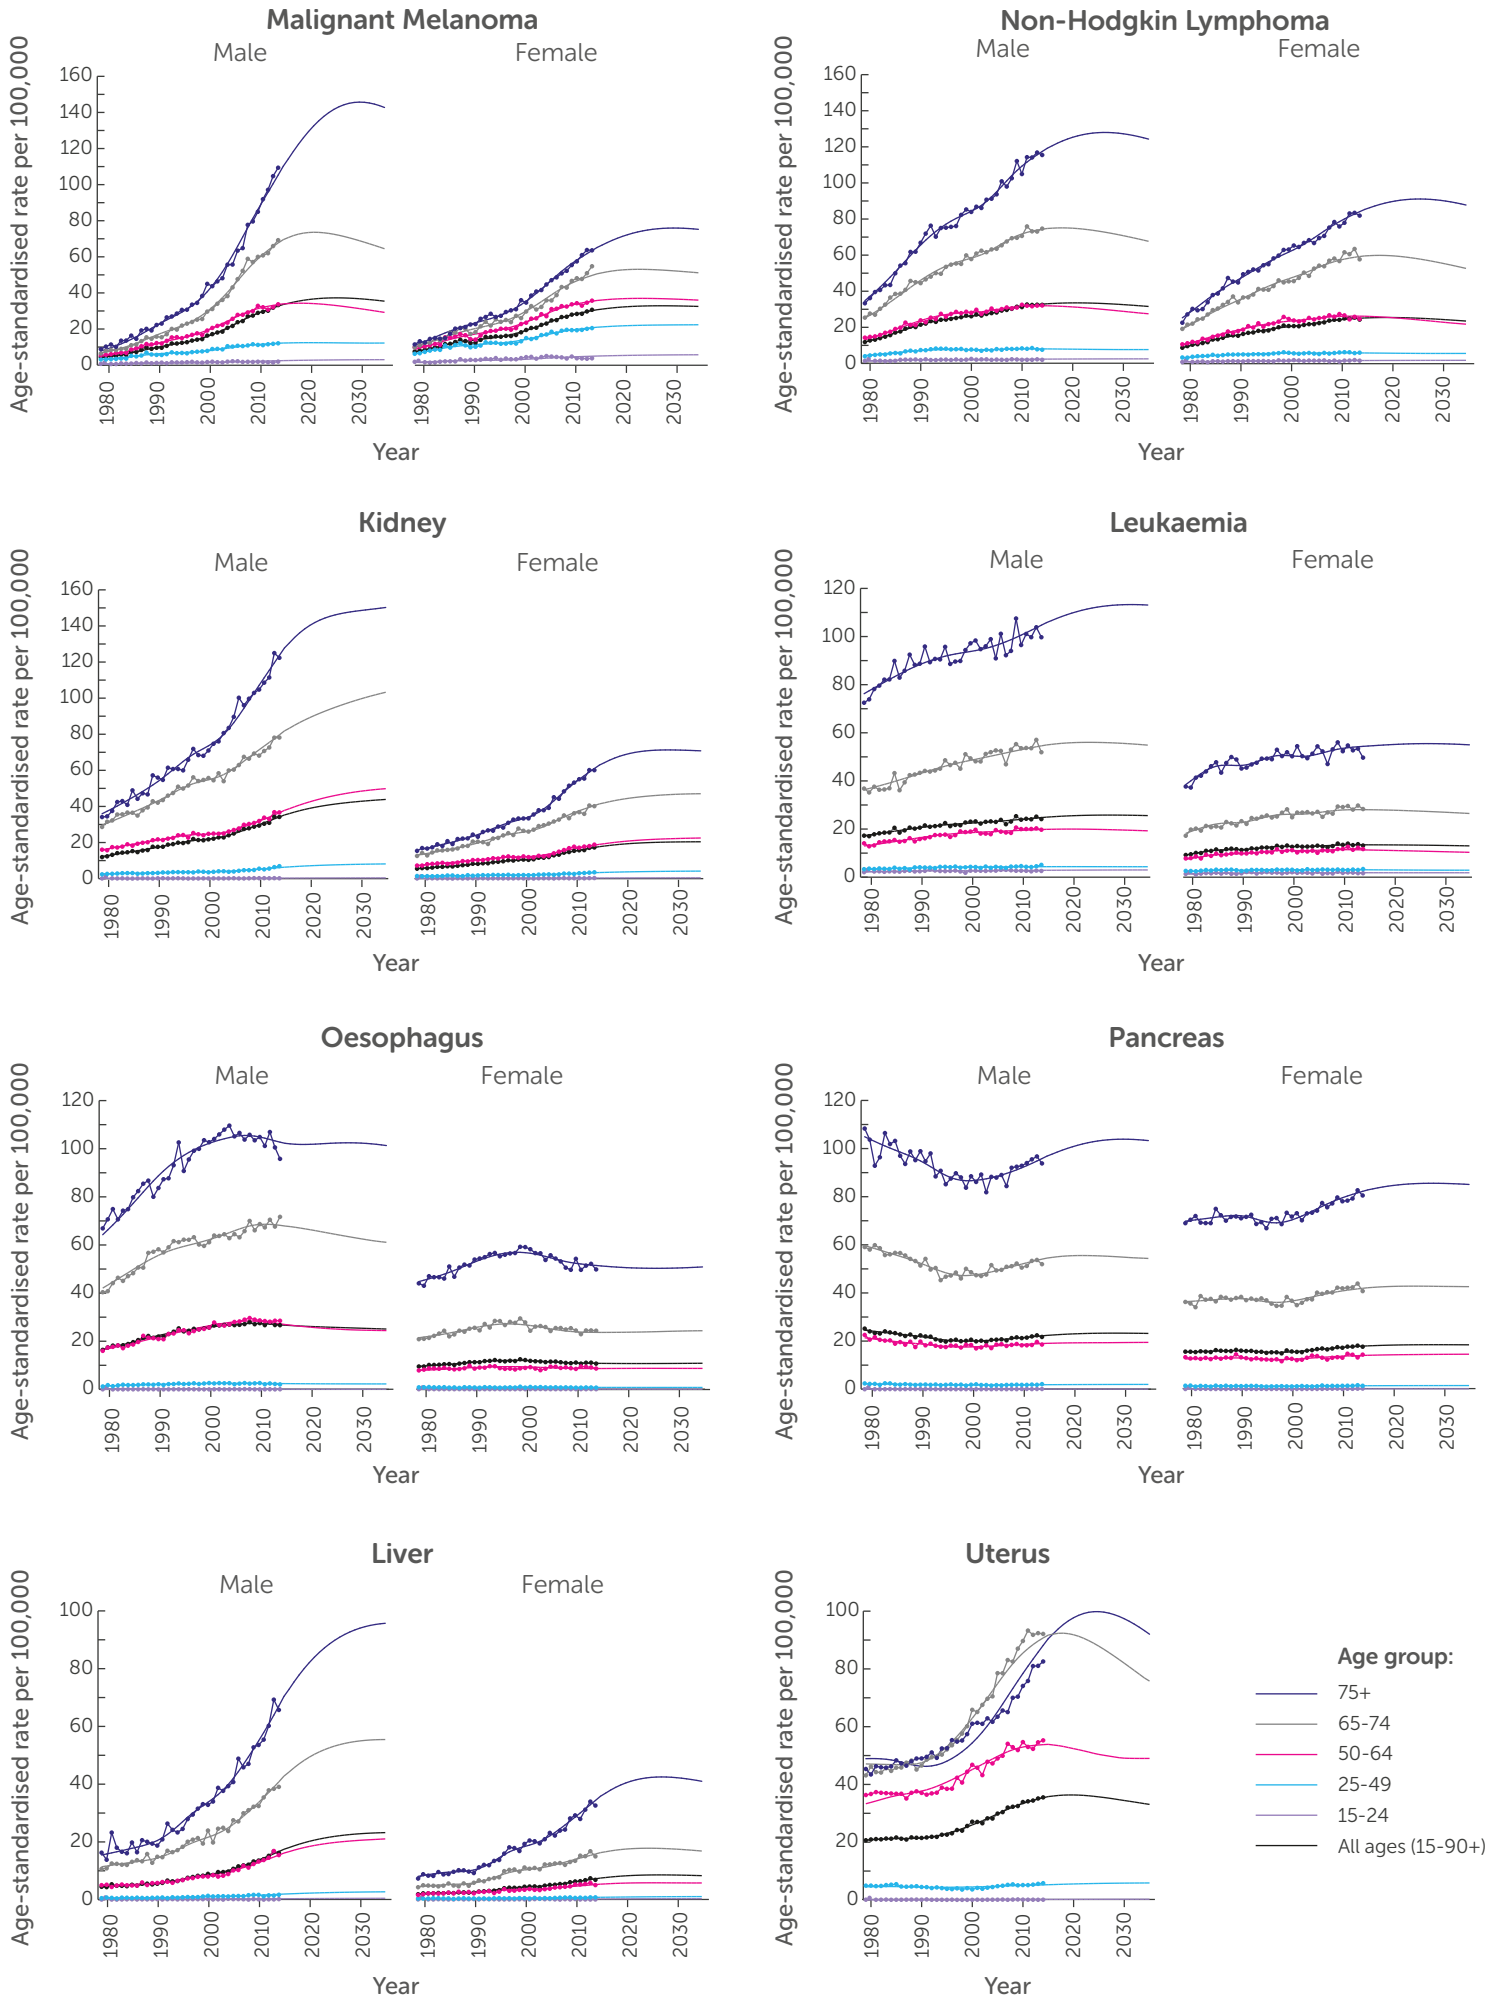

# Observed and projected incidence age standardised rates (ASRs) per 100,000 15-90+ year olds, for each cancer site by age group and sex

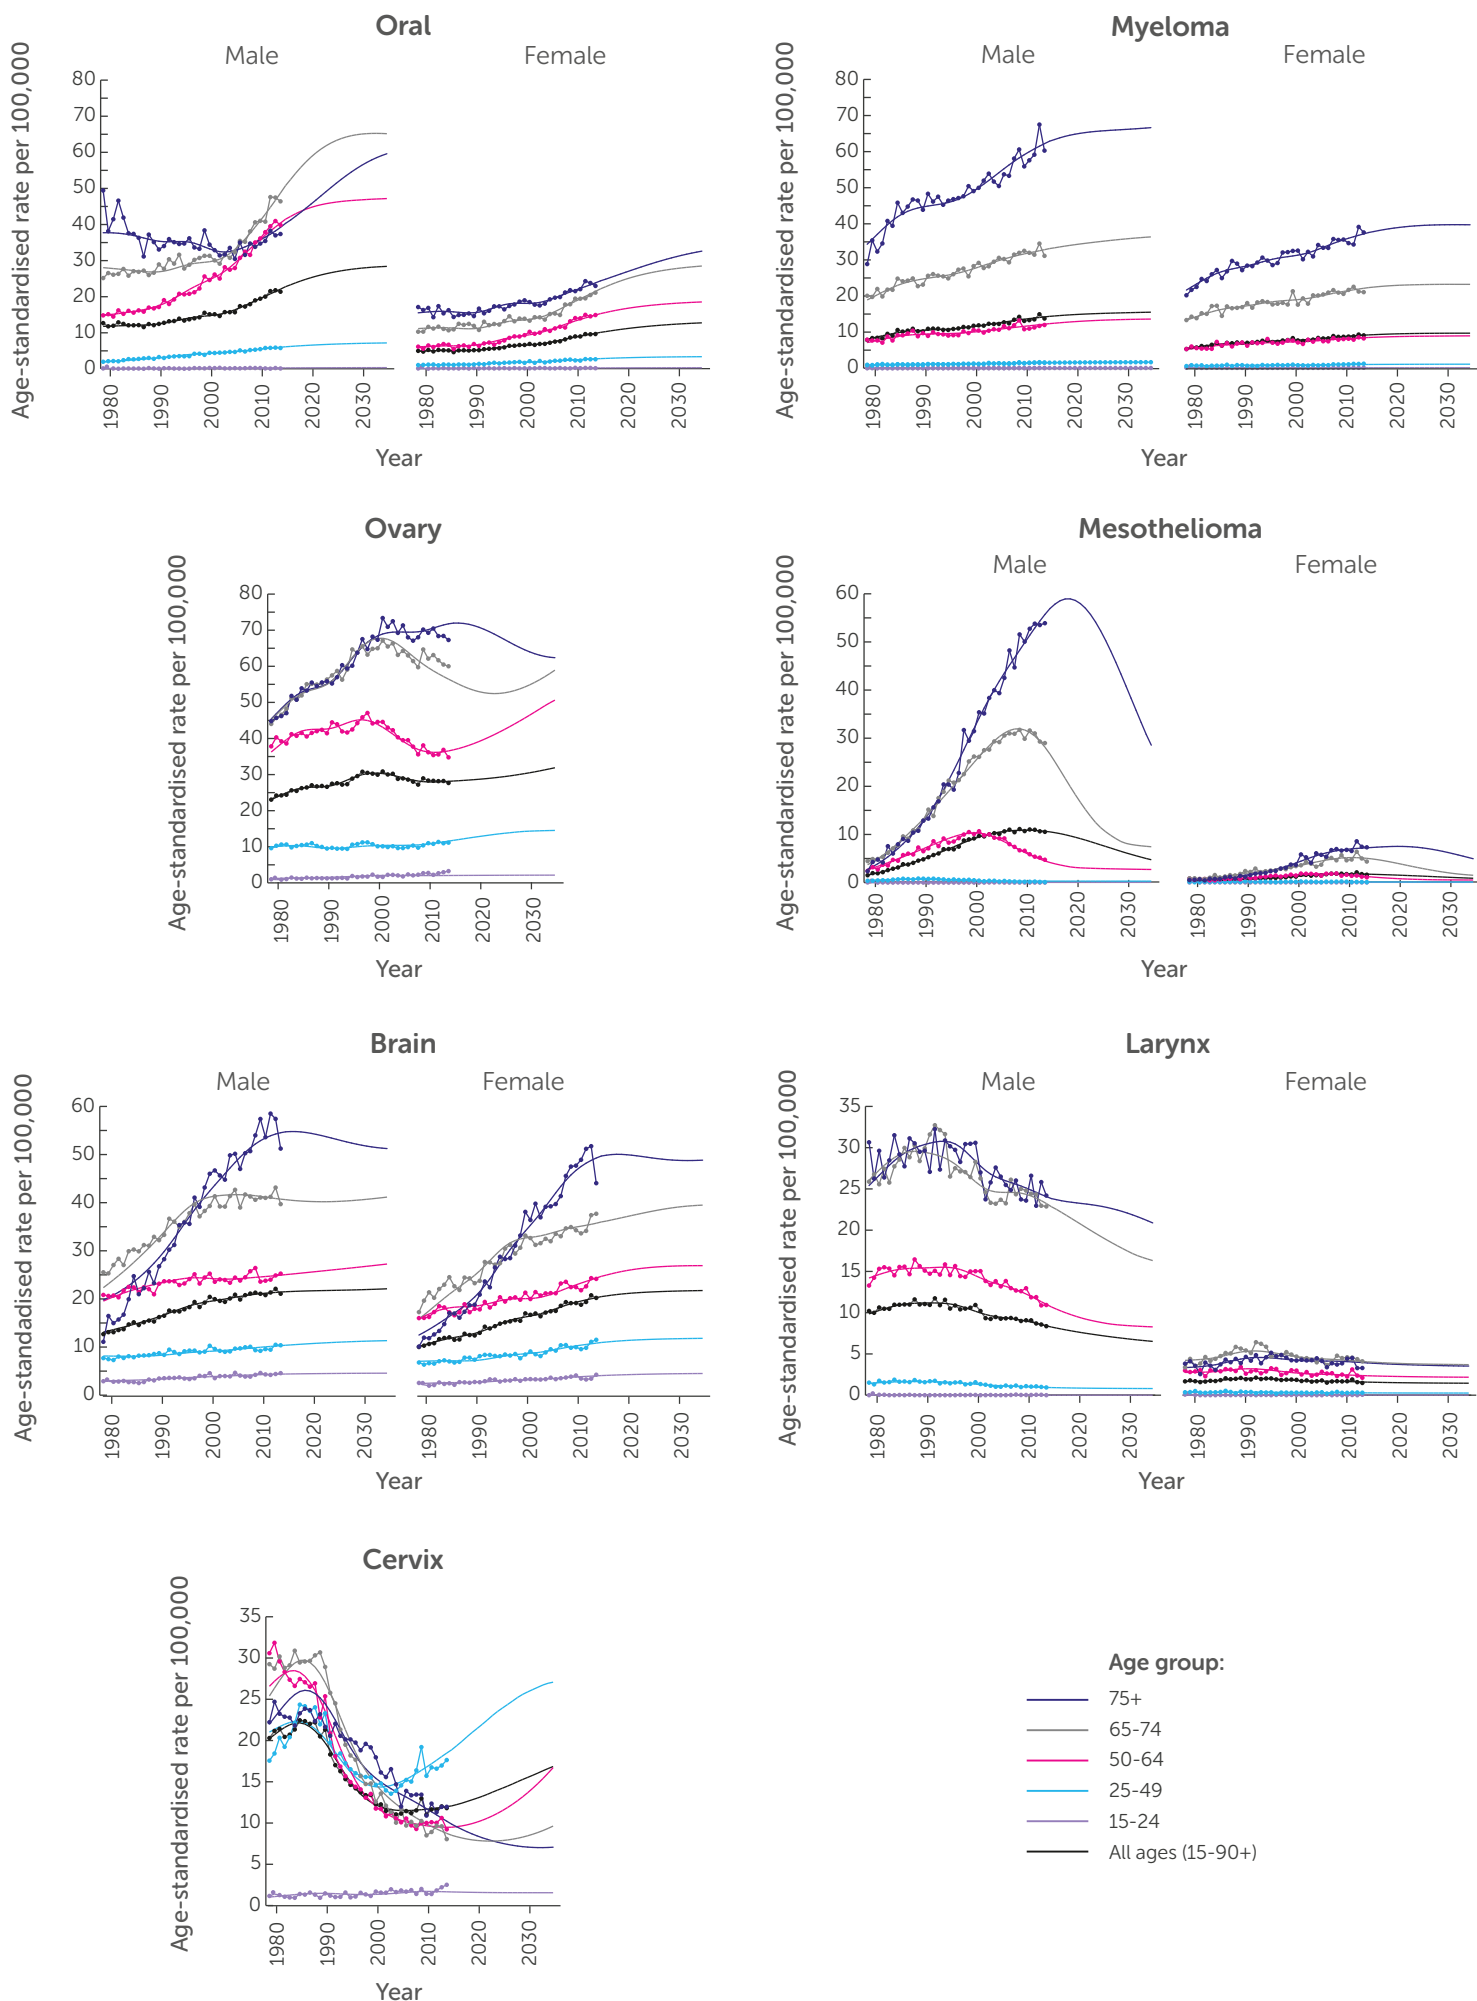

# Observed and projected incidence age standardised rates (ASRs) per 100,000 15-90+ year olds, for each cancer site by age group and sex

## Thyroid

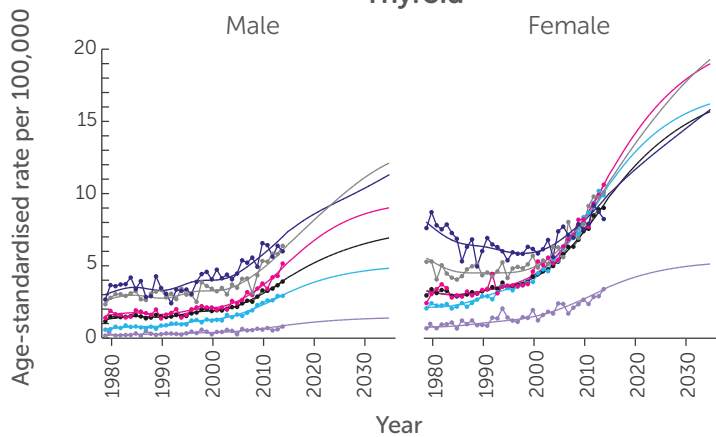

## Testis

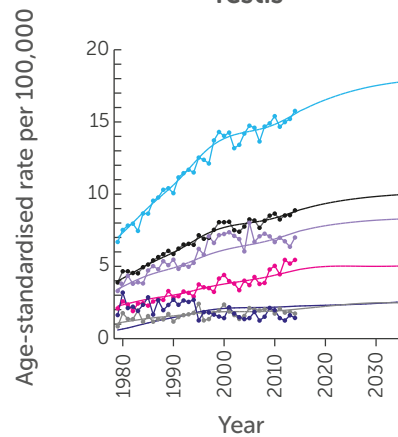

## Anus

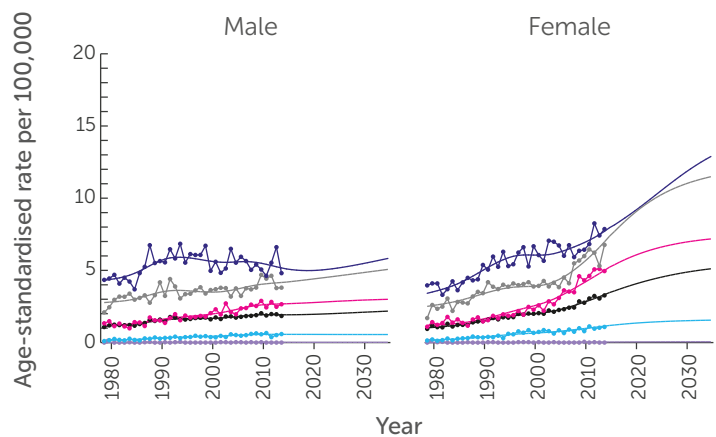

### Age group:

- 75+
- 65-74
- 50-64
- 25-49
- 15-24
- All ages (15-90+)

## Bone

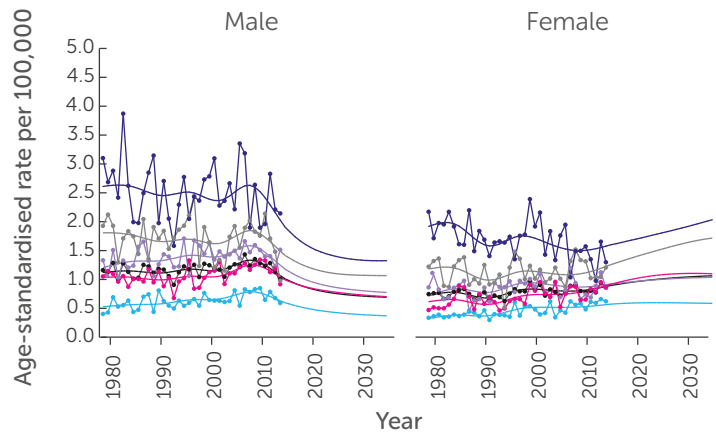

## Hodgkin Lymphoma

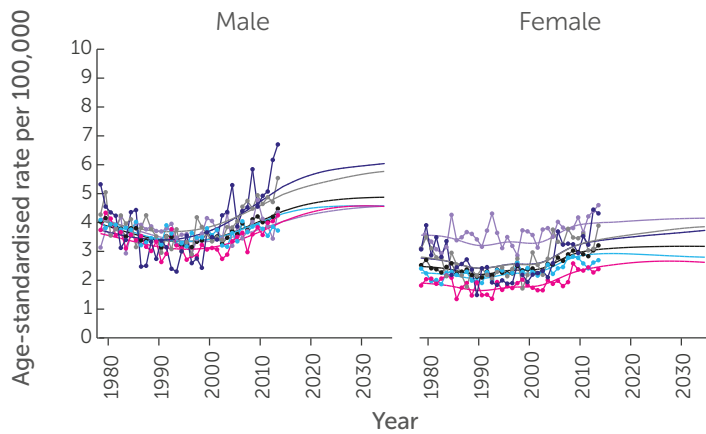

Supplement: bjc2016304x4.pdf [file bjc2016304x4.pdf]
