# Supplementary material for: Cancer incidence and mortality projections in the UK until 2035
Source: PubMed Central journal article supplement (PMC5117795; doi:10.1038/bjc.2016.304), 2016-10-11

**Observed and projected mortality age standardised rates (ASRs) per 100,000 15-90+ year olds, for each cancer site by age group and sex**

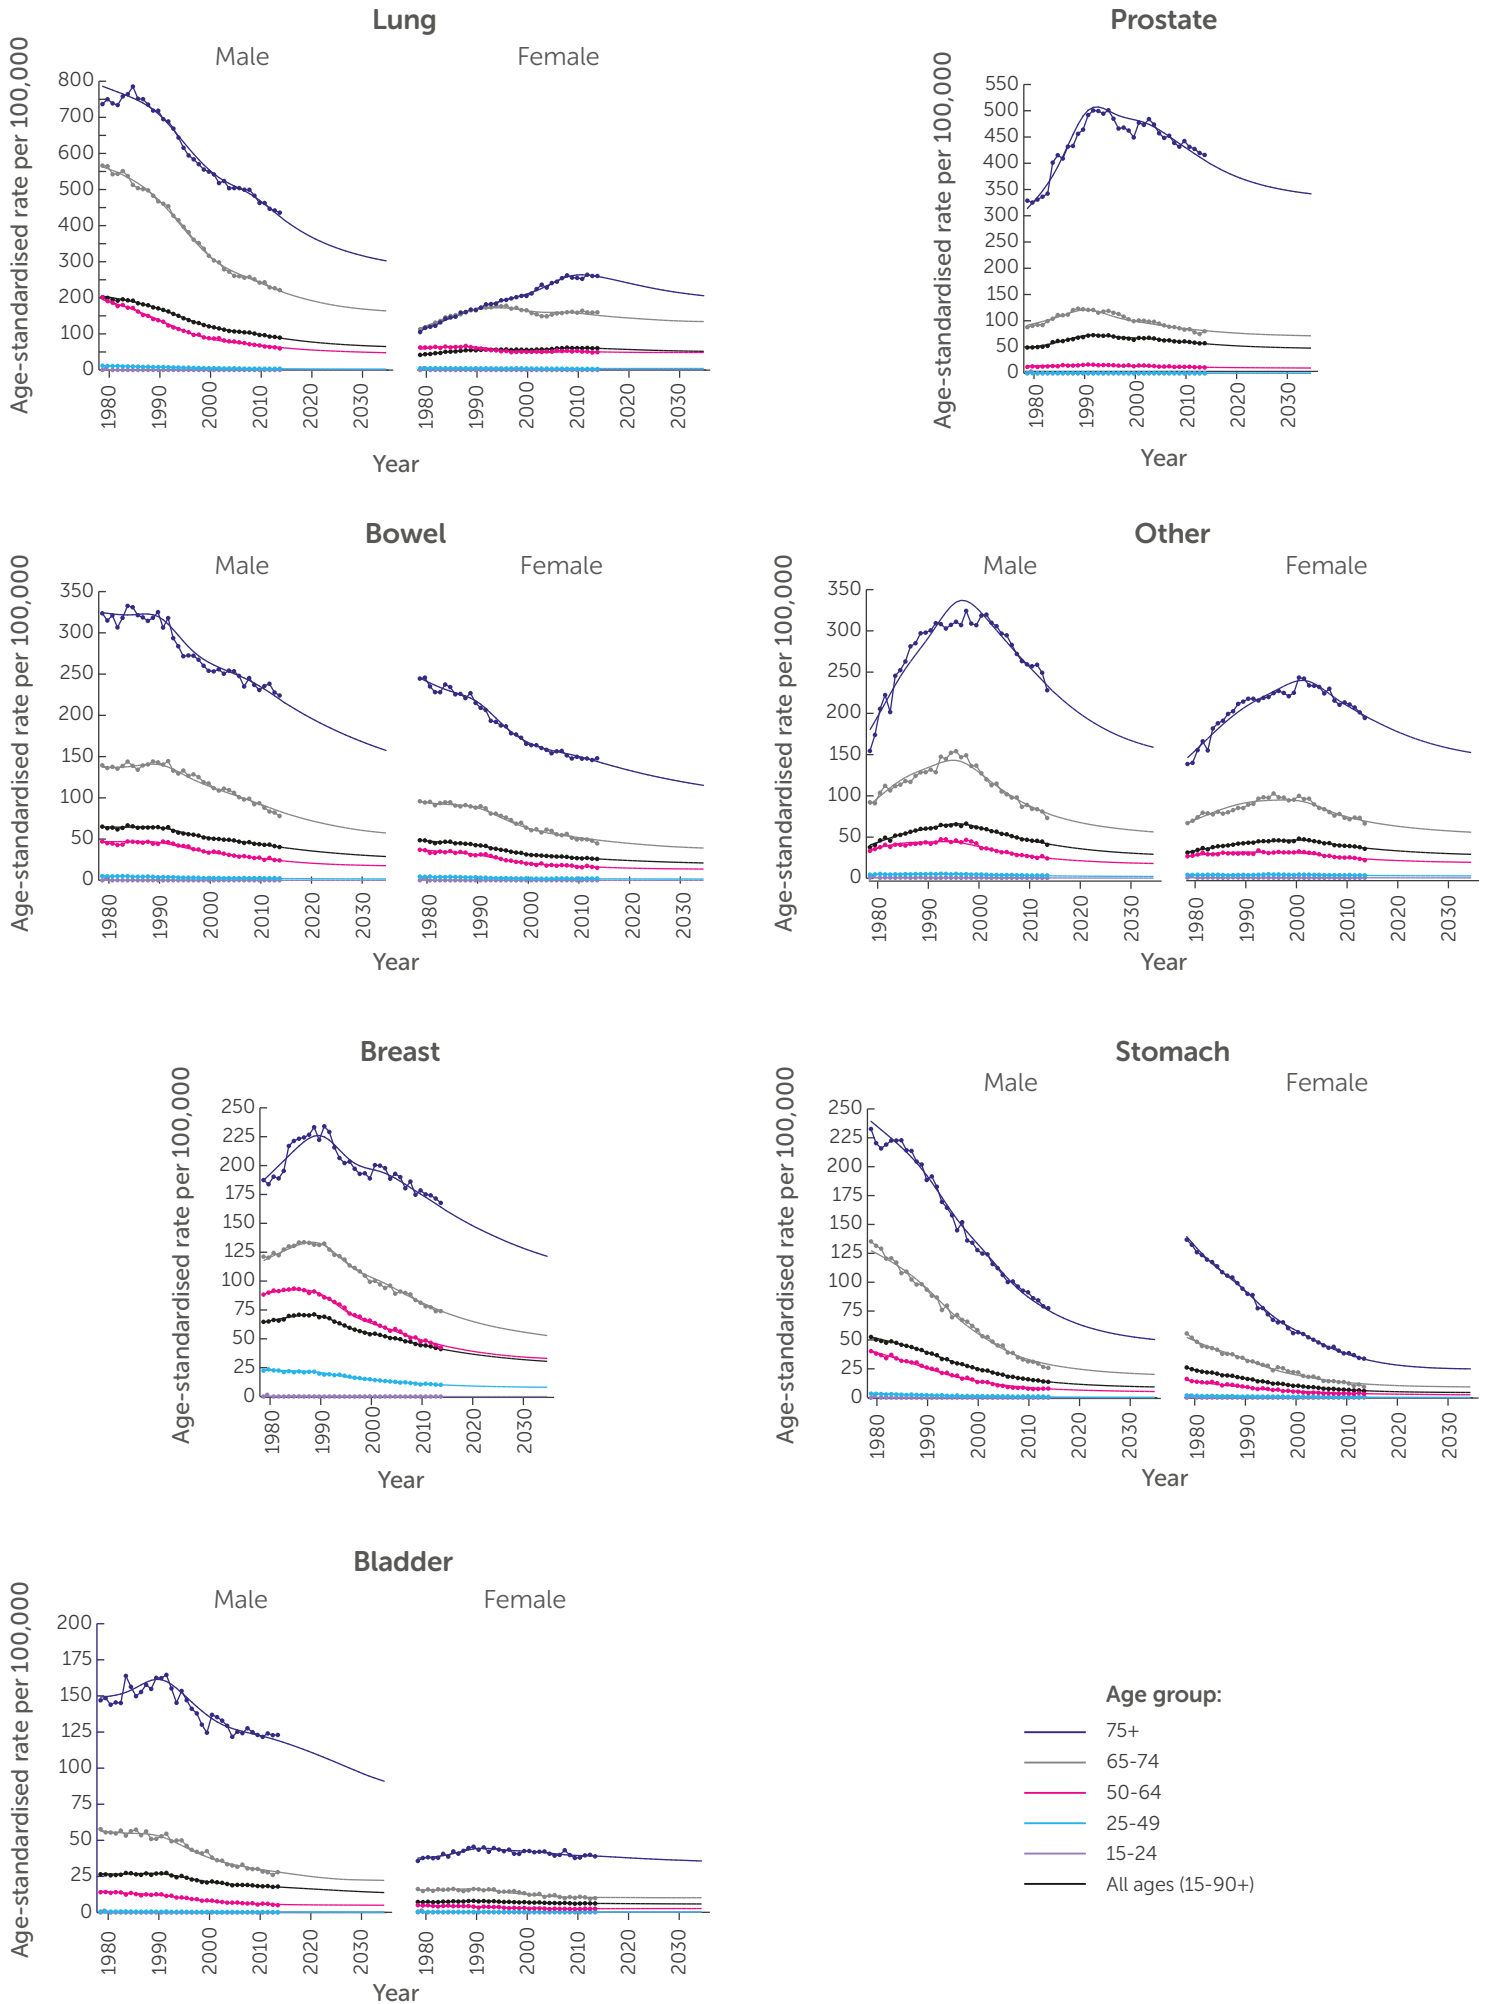

**Observed and projected mortality age standardised rates (ASRs) per 100,000 15-90+ year olds, for each cancer site by age group and sex**

**Oesophagus**

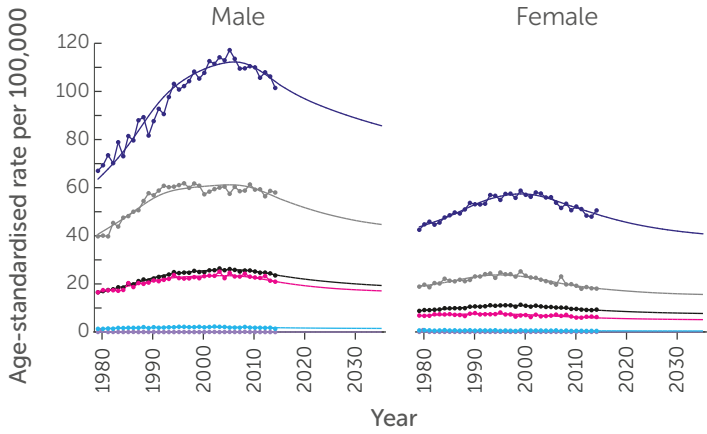

**Pancreas**

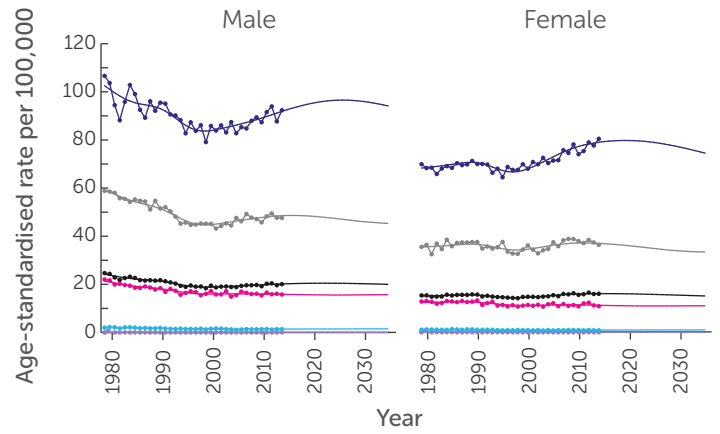

**Liver**

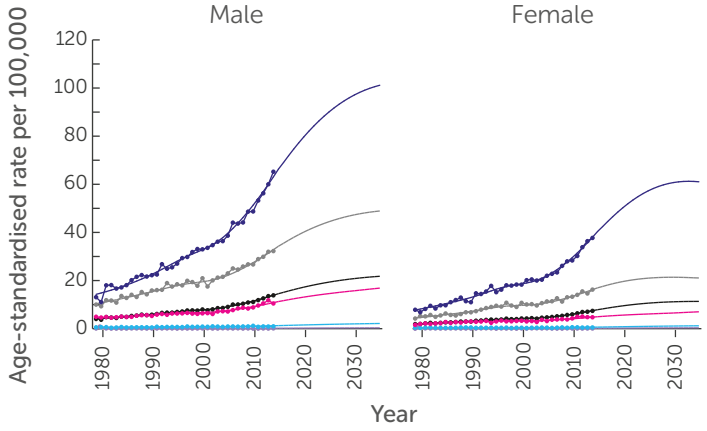

**Leukaemia**

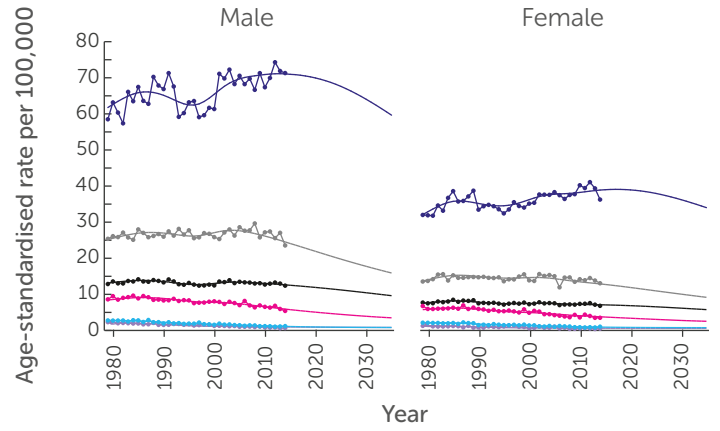

**Non-Hodgkin Lymphoma**

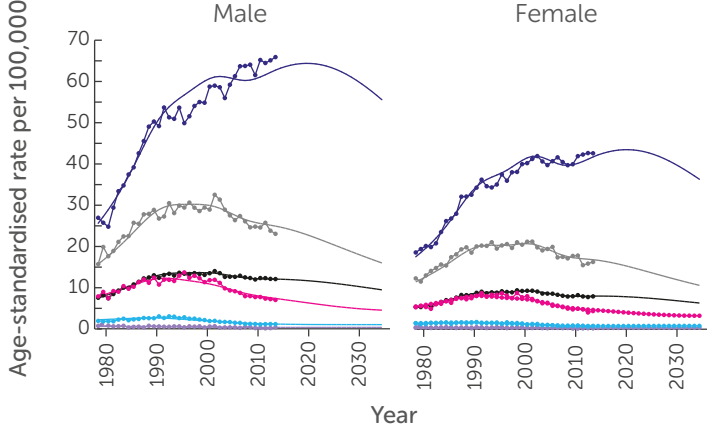

**Kidney**

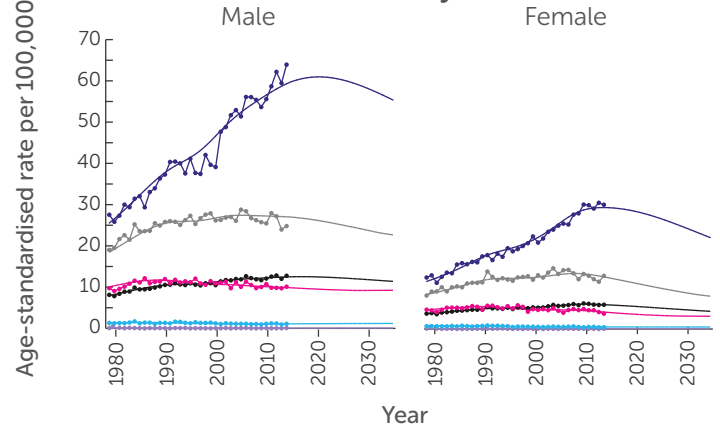

**Mesothelioma**

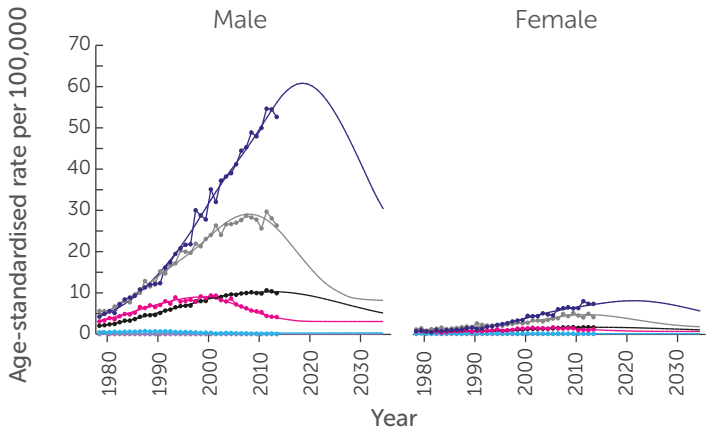

**Ovary**

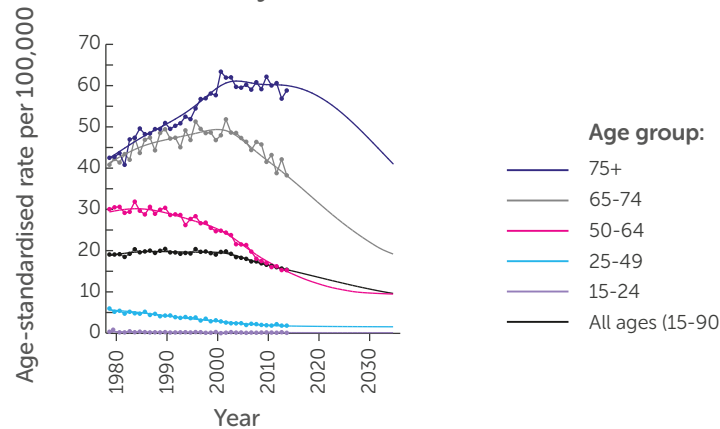

**Age group:**

- 75+
- 65-74
- 50-64
- 25-49
- 15-24
- All ages (15-90+)

Observed and projected mortality age standardised rates (ASRs) per 100,000 15-90+ year olds, for each cancer site by age group and sex

Uterus

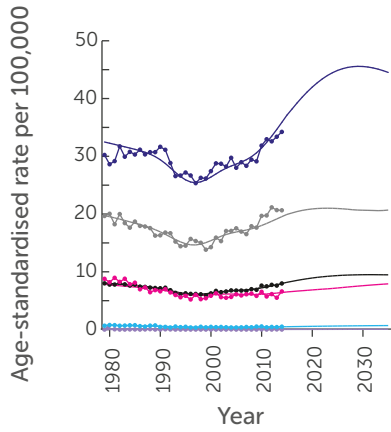

Myeloma

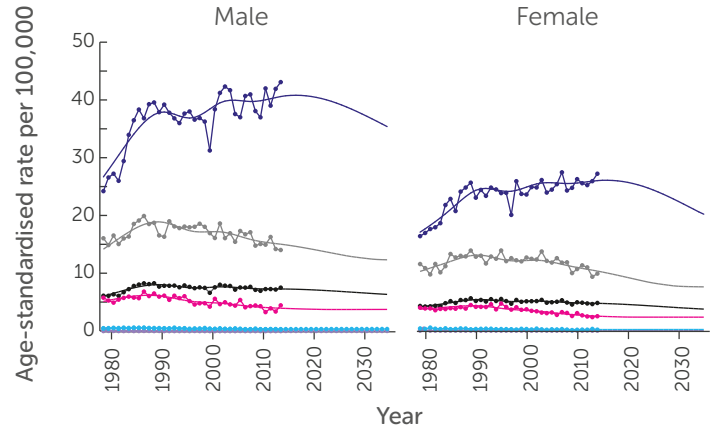

Brain

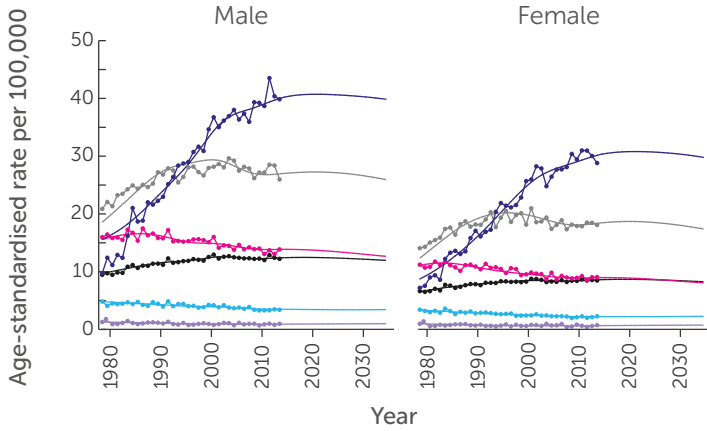

Malignant Melanoma

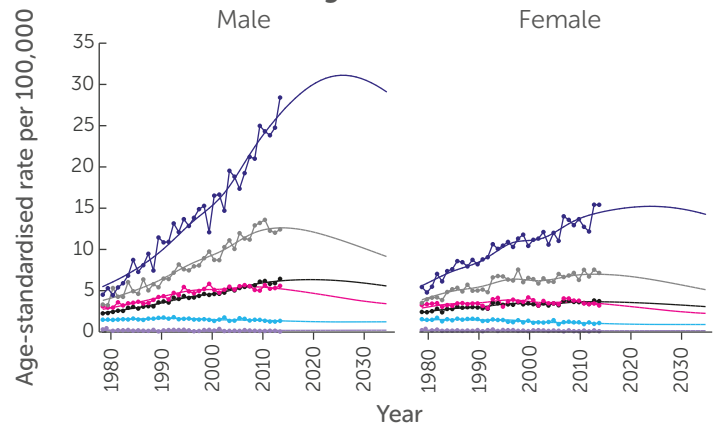

Oral

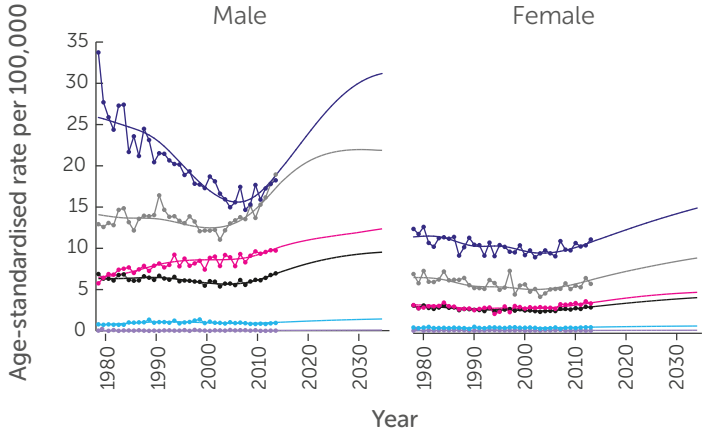

Larynx

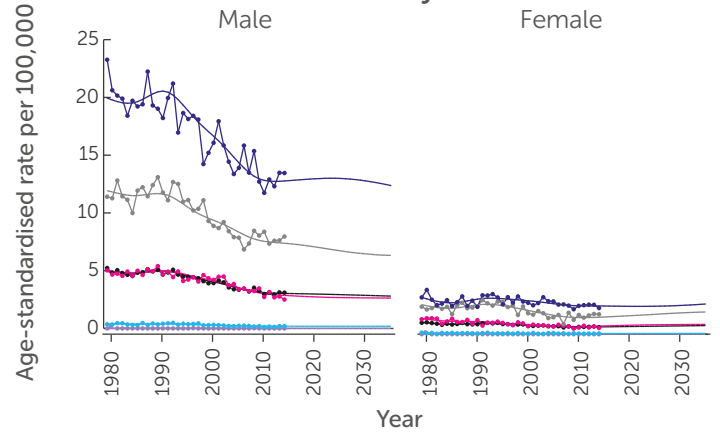

Cervix

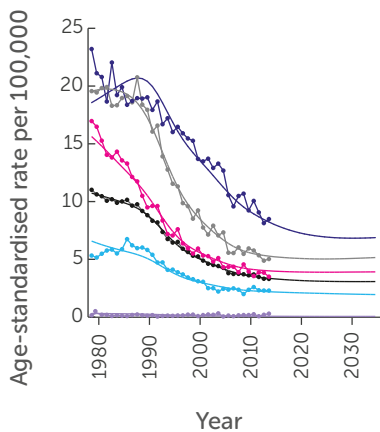

Age group:

- 75+
- 65-74
- 50-64
- 25-49
- 15-24
- All ages (15-90+)

**Observed and projected mortality age standardised rates (ASRs) per 100,000 15-90+ year olds, for each cancer site by age group and sex**

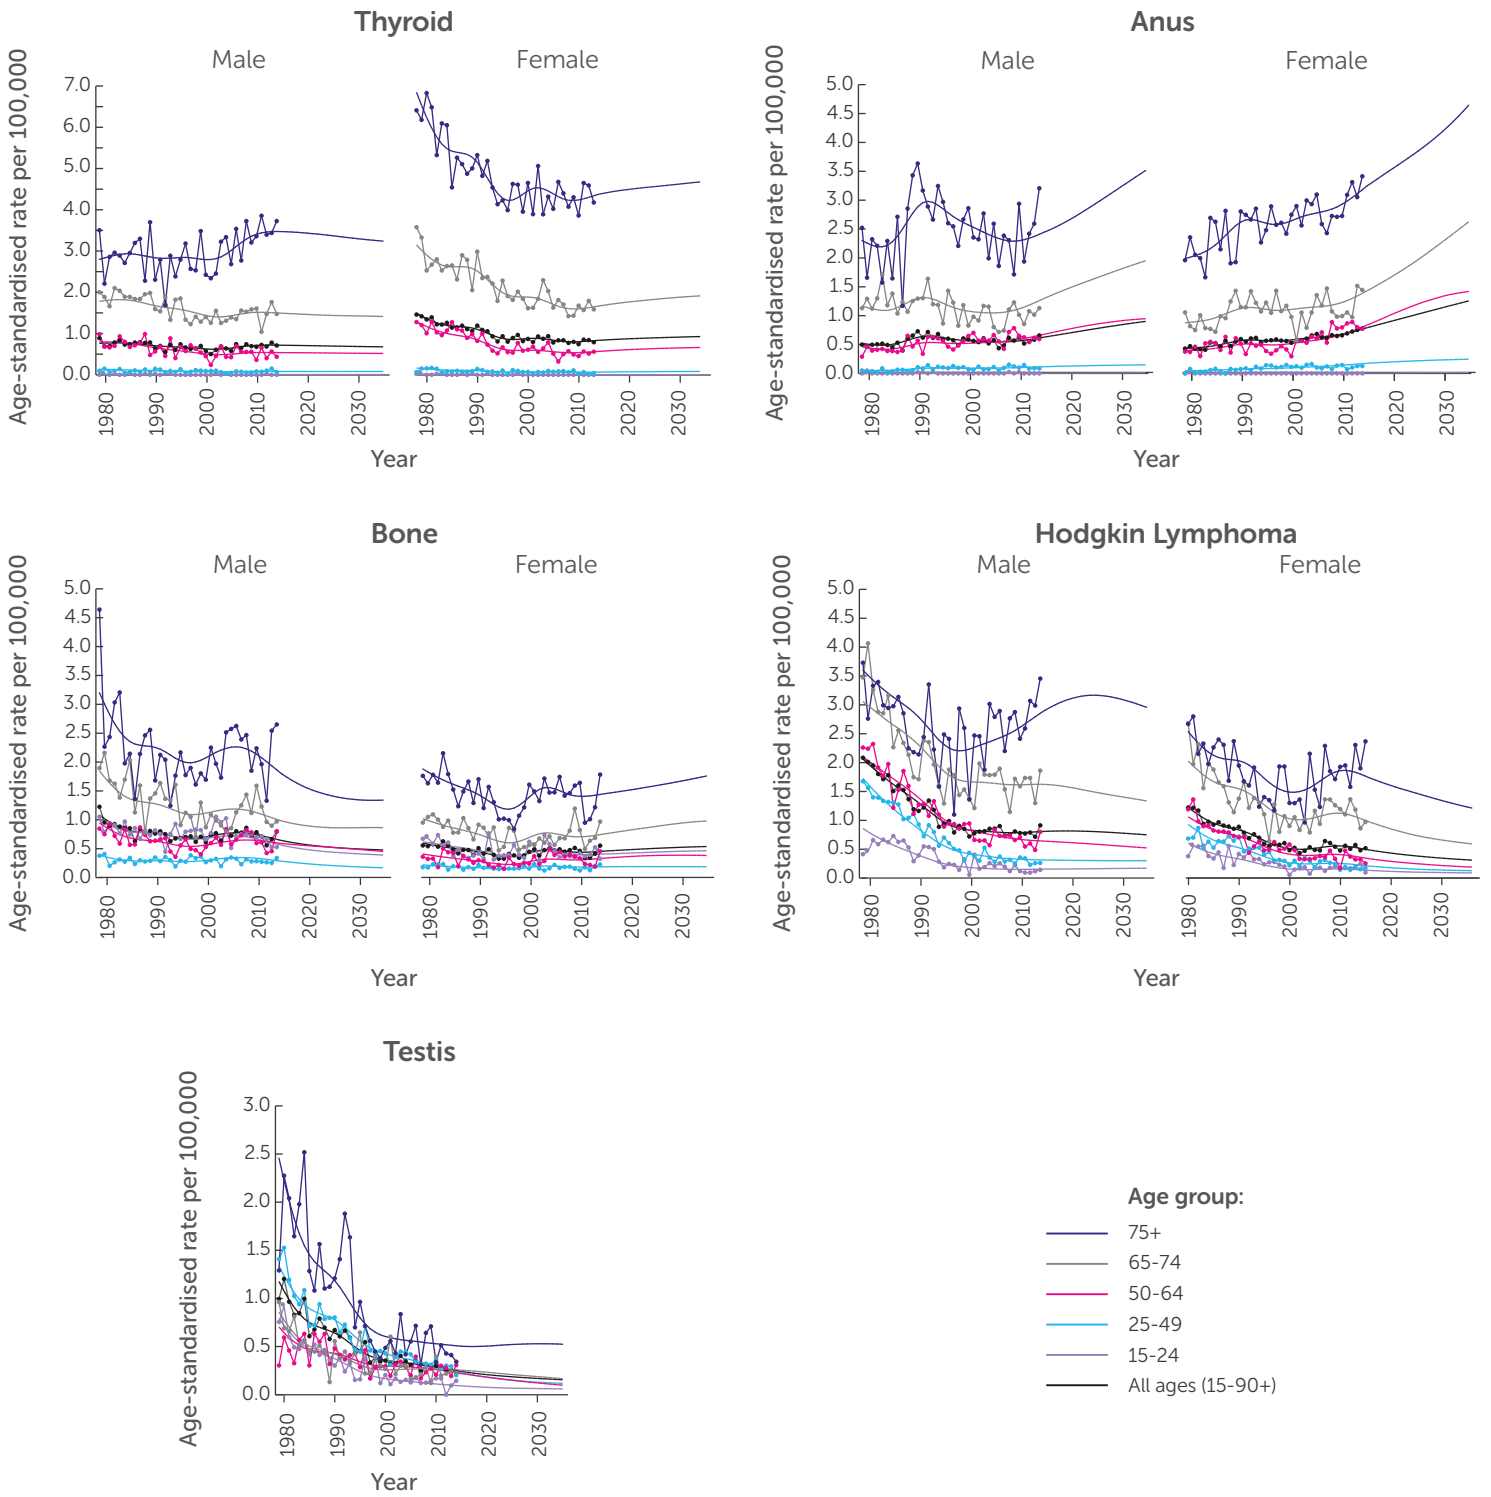

Supplement: bjc2016304x6.pdf [file bjc2016304x6.pdf]
