# Supplementary material for: Cancer incidence and mortality projections in the UK until 2035
Source: PubMed Central journal article supplement (PMC5117795; doi:10.1038/bjc.2016.304), 2016-10-11

Average registration completeness over an 8 year period by cancer site

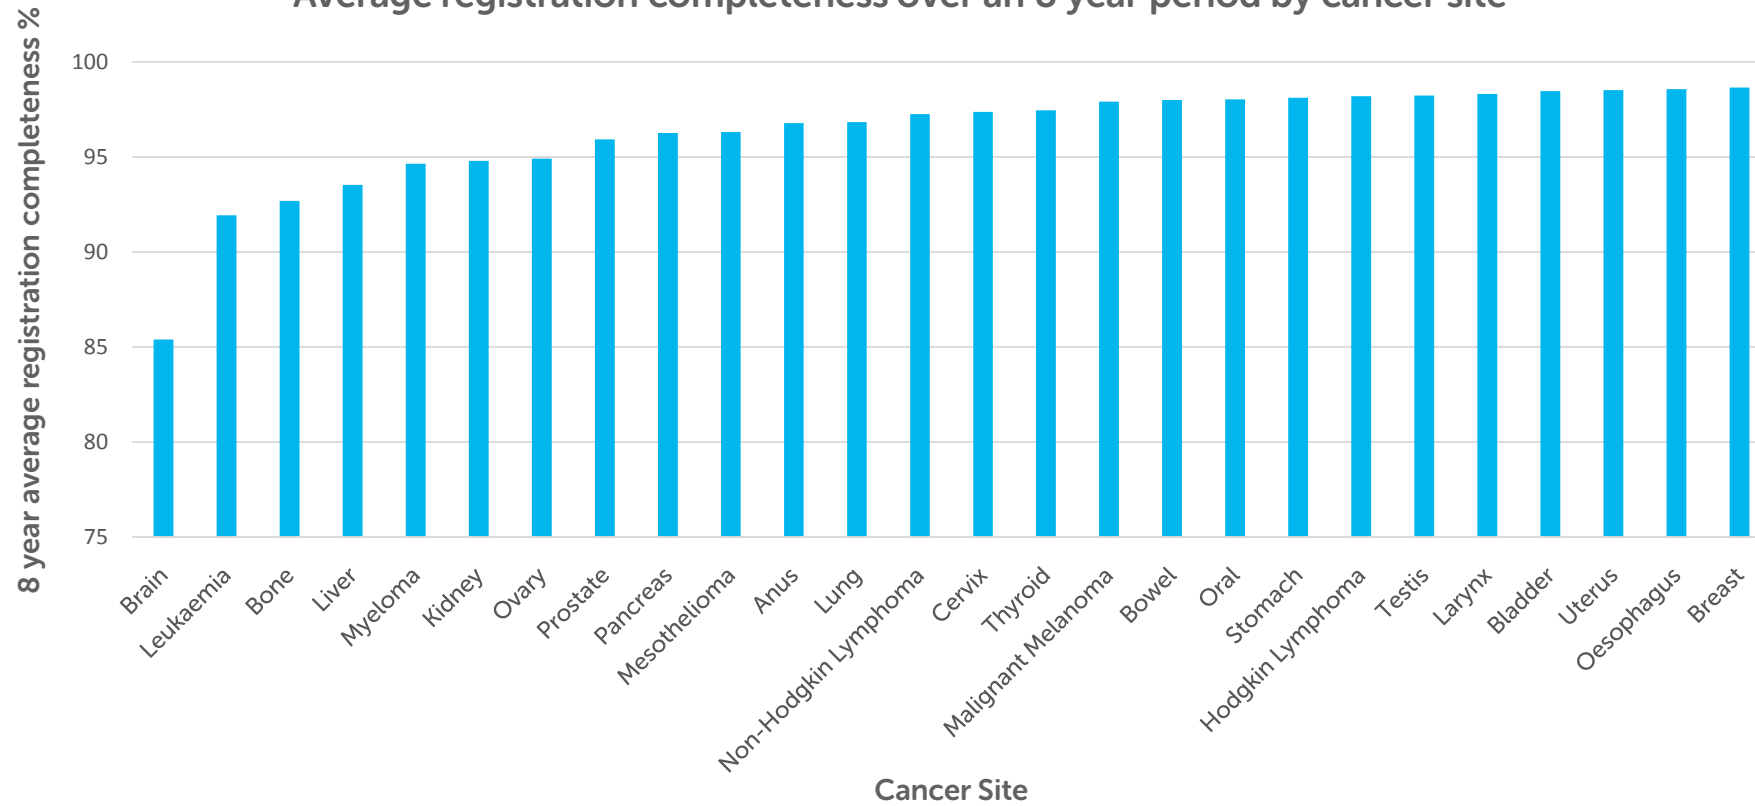

Supplement: bjc2016304x10.pdf [file bjc2016304x10.pdf]
